# Supplementary material for: Long-term immunity against yellow fever in children vaccinated during infancy: a longitudinal cohort study
Source: PubMed Central journal article supplement (PMC6892259; doi:10.1016/s1473-3099(19)30323-8), 2019-12
Supplement: mmc1.pdf [file mmc1.pdf]

# THE LANCET Infectious Diseases

## Supplementary webappendix

This webappendix formed part of the original submission and has been peer reviewed. We post it as supplied by the authors.

Supplement to: Domingo C, Fraissinet J, Ansah PO, et al. Long-term immunity against yellow fever in children vaccinated during infancy: a longitudinal cohort study. *Lancet Infect Dis* 2019; published online Sept 19. [https://doi.org/10.1016/S1473-3099\(19\)30323-8](https://doi.org/10.1016/S1473-3099(19)30323-8).

## Appendix

### Long-term immunity against yellow fever in children vaccinated during infancy: a longitudinal observational study

#### Contents

|                                                                                                           | <b>Page</b> |
|-----------------------------------------------------------------------------------------------------------|-------------|
| <b>Appendix note 1:</b> References for the MenAfriVac studies in international trial registries           | 2           |
| <b>Appendix note 2:</b> Permutation tests                                                                 | 3           |
| <b>Appendix figure 1:</b> Density plots of the distributions of antibody concentrations                   | 4           |
| <b>Appendix figure 2:</b> Box plots of antibody concentrations in categories of seropositive children     | 5           |
| <b>Appendix table 1:</b> Statistics for serostable participants in the Ghana cohort                       | 6           |
| <b>Appendix table 2:</b> Statistics for seroreverters and late seroconverters in the Ghana cohort         | 7           |
| <b>Appendix figure 3:</b> Seroreversion and late seroconversion in the Ghanaian group                     | 8           |
| <b>Appendix table 3:</b> Proportions of males and females in the study populations and serological strata | 9           |
| <b>Appendix table 4:</b> Mean antibody concentrations by sex and seropositivity tier                      | 9           |
| <b>Appendix table 5:</b> McNemar's tests on the paired year-2·3 and year-6 sera from the Ghana cohort     | 10          |
| <b>Appendix references</b>                                                                                | 10          |

## Appendix note 1: References for the MenAfriVac studies in international trial registries

1. PsATT-004, Ghana.  
ISRCTN registry number ISRCTN82484612.  
URL: <https://doi.org/10.1186/ISRCTN82484612>

A phase II, double-blind, randomised, controlled, dose ranging study to evaluate the safety, immunogenicity, dose response and schedule response of a meningococcal A conjugate vaccine administered concomitantly with local expanded program on immunisation (EPI) vaccines in healthy infants.

2. Pers-007 (phase IV), Ghana.  
ISRCTN registry number ISRCTN10763234.  
URL: <https://doi.org/10.1186/ISRCTN10763234>

Evaluation of antibody persistence in Ghanaian children more than five years after vaccination with MenAfriVac<sup>®</sup> widely used in Sub-Saharan Africa to prevent epidemic meningitis.

3. PsATT-007, Mali.  
Pan African Clinical Trials Registry number PACTR201110000328305  
URL: <https://pactr.samrc.ac.za/TrialDisplay.aspx?TrialID=328>

A Phase III, double-blind, randomized, controlled study to evaluate the immunogenicity and safety of different schedules and formulations of a meningococcal A conjugate vaccine administered concomitantly with local EPI vaccines in healthy infants and toddlers.

4. Pers-007 (phase IV), Mali.  
ISRCTN registry number ISRCTN37623829  
URL: <https://doi.org/10.1186/ISRCTN37623829>

Long-term follow-up of children who participated at 9-12 months of age in clinical trial PsA-TT-007 in Mali.

## Appendix note 2: Permutation tests

The permutation tests were designed after Good.<sup>1</sup> The R scripts implementing these tests are available at the URL: <https://doi.org/10.5281/zenodo.2684194>

### *Independent-samples permutation test*

We performed a permutation test on two independent antibody concentration sets  $x$  and  $y$  of size  $n$  and  $m$  to test the null hypothesis that the geometric mean concentrations (GMCs) are the same between the two groups of study participants. For this, we computed the difference of the respective GMCs,  $\Delta GMC$ . Next, we compared this statistic against an empirical null distribution of the difference of GMCs that we generated by the Monte Carlo approach, as follows. We combined  $x$  and  $y$  into a single dataset (under the null hypothesis that the two sets of observations are identically distributed), drew a randomly-permuted dataset of size  $N = n + m$  by sampling the combined dataset without replacement, and split this permuted dataset into two subsets  $x'$  and  $y'$  of size  $n$  and  $m$ . We computed and recorded the difference of GMCs between  $x'$  and  $y'$ ,  $\Delta GMC'$ , and repeated the sampling and computation steps for  $B = 999999$  total replications. Lastly, we computed a p-value by the formula:

$$p = (T + 1)/(B + 1) \quad (1)$$

where  $T$  denotes the number of cases in the permutation distribution where  $\Delta GMC' \geq \Delta GMC$  in absolute value (two-tailed test).

### *Paired-samples permutation test*

We performed a paired-samples permutation test to assess net changes in antibody concentrations between the first and second serum collections from the same study group of size  $n$ . Specifically, we tested the null hypothesis that the sum of differences between the paired concentrations equaled zero. We log-transformed the concentration data, and computed the sum of differences  $S$  across the  $n$  pairs of values. Next, we took the absolute value of each difference, gave it a plus or minus sign at random, and computed and recorded the sum of the  $n$  randomly-signed differences,  $S'$ . We repeated this step for  $B = 999999$  total replications to build an empirical null distribution for the sum of differences. Lastly, we computed a p-value using equation (1) above with  $T$  as the number of cases in the permutation distribution where  $S' \geq S$  in absolute value (two-tailed test).

### *Choice of the number of permutations*

$B = 999999$  was selected as sufficient to provide precision to three decimal digits when  $p = 0.05$ , i.e. such that the 95% confidence interval (CI) for the true p-value lie inside the interval  $[0.0495, 0.0505]$ . The bounds of the 95% CI for the true p-value were computed by the following formula after Ruxton and Neuhauser,<sup>2</sup>

$$p \pm z_{(1-0.5\alpha)} \sqrt{\frac{p(1-p)}{B+1}} \quad (2)$$

where  $z_{(1-0.5\alpha)}$  denotes the  $(1 - 0.5\alpha)$  quantile of the standard normal distribution ( $\approx 1.96$  for  $\alpha = 0.05$ ), and  $p = 0.05$ .

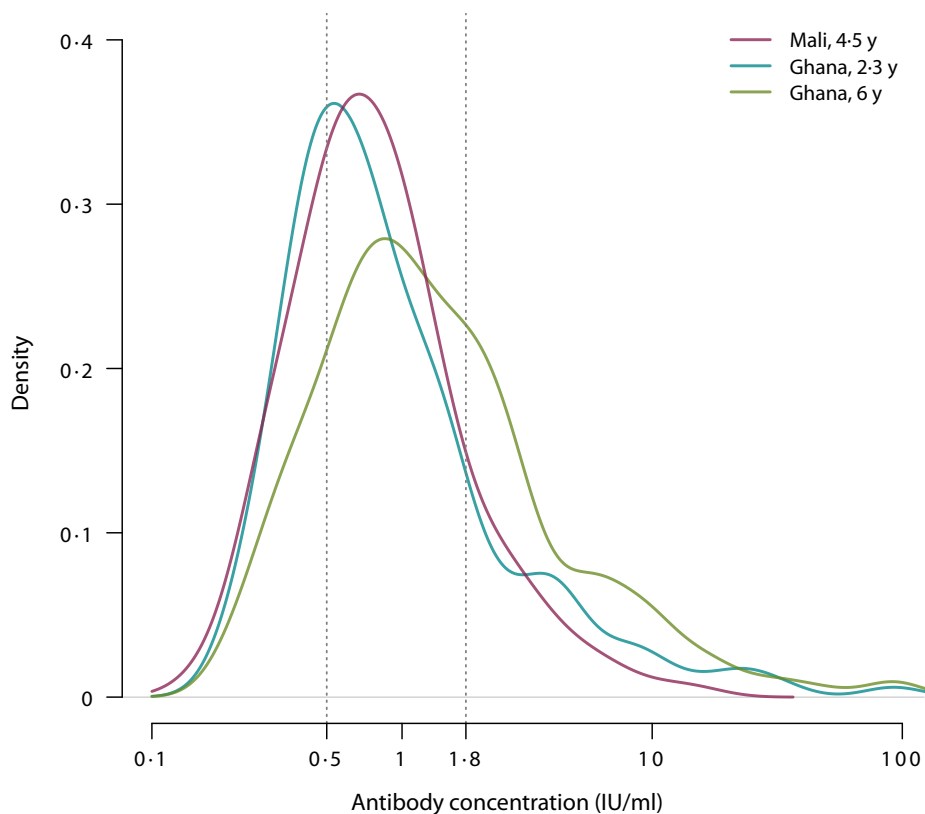

**Appendix figure 1: Kernel density plot of the distributions of antibody concentrations.** The figure compares the distributions of antibody concentrations between study groups and follow-up time points. The data correspond in each case to the combined seropositive and borderline strata. The dotted lines denote the seropositivity threshold (0.5 IU/ml), and the 1.8 IU/ml threshold between the low and high tiers of seropositives.

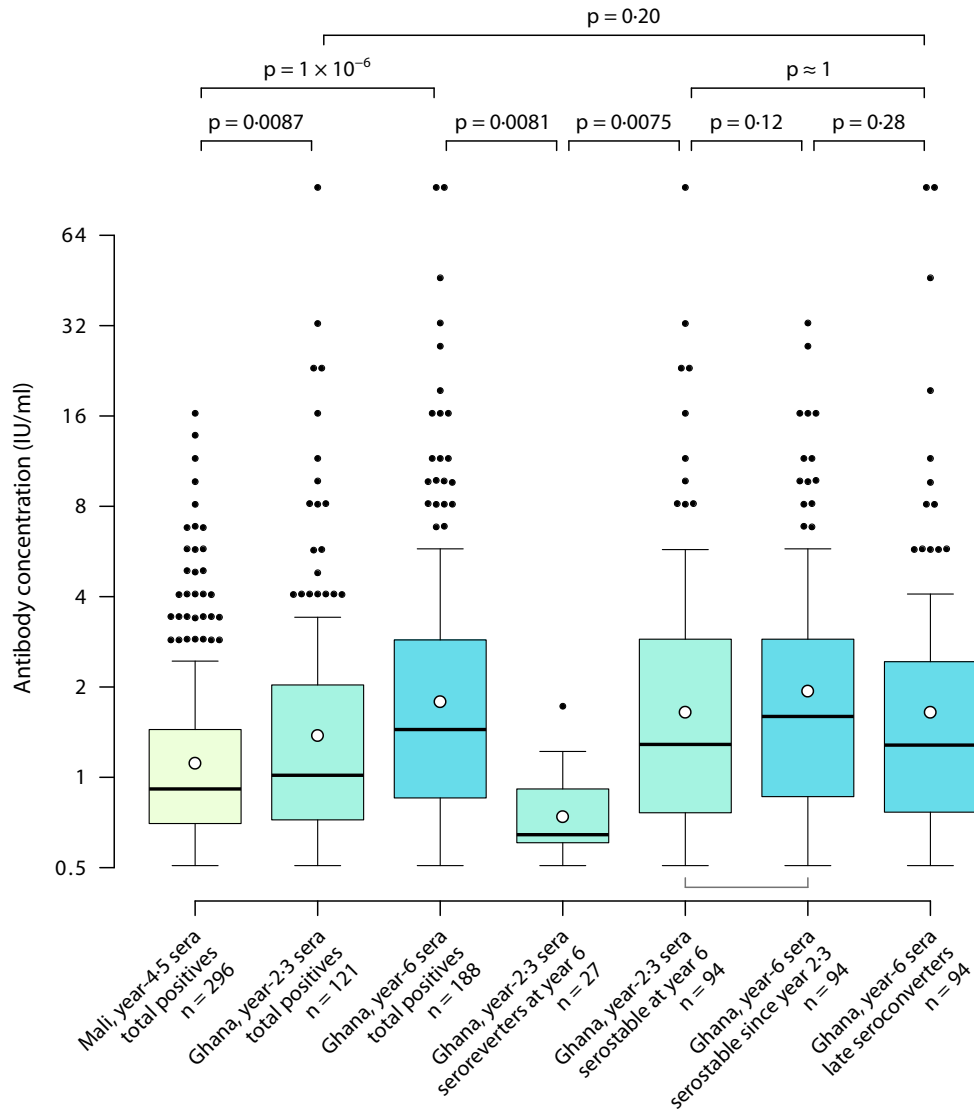

**Appendix figure 2: Box plots of antibody concentrations in categories of seropositive children.** White dots denote the respective geometric mean concentrations (GMCs); paired data sets are connected by an underside bracket. Two-tailed p-values test for equality of GMCs (independent-samples permutation test) or a net concentration change in the paired samples (permutation sign-test).

| <b>I. Serostable participants</b> | <b>N</b> | <b>Percentage of vaccinees (95% CI)</b> | <b>Percentage of year-2·3 seropositives</b> | <b>Percentage of year-6 seropositives</b> | <b>Males (%)</b> | <b>Females (%)</b> |
|-----------------------------------|----------|-----------------------------------------|---------------------------------------------|-------------------------------------------|------------------|--------------------|
| Total                             | 94       | 21·6% (17·7–25·4)                       | 77·7%                                       | 50·0%                                     | 49 (52%)         | 45 (48%)           |
| Low tier, year 2·3                | 63       | 14·4                                    | 52·1%                                       | n.a.                                      | 36 (57%)         | 27 (43%)           |
| High tier, year 2·3               | 31       | 7·1                                     | 25·6%                                       | n.a.                                      | 13 (42%)         | 18 (58%)           |
| Low tier, year 6                  | 50       | 11·5                                    | n.a.                                        | 26·6%                                     | 22 (44%)         | 28 (56%)           |
| High tier, year 6                 | 44       | 10·1                                    | n.a.                                        | 23·4%                                     | 27 (61%)         | 17 (39%)           |

  

| <b>II. Antibody concentrations (IU/ml)</b> | <b>GMC (95% CI)</b> | <b>Median concentration (IQR)</b> | <b>GMC, males (95% CI)</b> | <b>GMC, females (95% CI)</b> |
|--------------------------------------------|---------------------|-----------------------------------|----------------------------|------------------------------|
| Year-2·3 sera                              |                     |                                   |                            |                              |
| Total                                      | 1·65 (1·35–2·05)    | 1·29 (0·762–2·87)                 | 1·52 (1·15–2·05)           | 1·81 (1·35–2·50)             |
| Low tier                                   | 0·908 (0·827–0·997) | 0·858 (0·684–1·29)                | 0·906 (0·798–1·03)         | 0·911 (0·797–1·04)           |
| High tier                                  | 5·56 (4·12–7·78)    | 4·08 (2·89–8·16)                  | 6·33 (3·97–10·4)           | 5·07 (3·50–8·07)             |
| Year-6 sera                                |                     |                                   |                            |                              |
| Total                                      | 1·94 (1·60–2·38)    | 1·60 (0·873–2·89)                 | 2·18 (1·66–2·91)           | 1·71 (1·31–2·27)             |
| Low tier                                   | 0·931 (0·844–1·03)  | 0·910 (0·721–1·26)                | 0·920 (0·800–1·06)         | 0·940 (0·819–1·08)           |
| High tier                                  | 4·47 (3·57–5·68)    | 3·41 (2·04–8·14)                  | 4·41 (3·28–6·05)           | 4·58 (3·27–6·63)             |

**Appendix table 1: Statistics for serostable participants in the Ghana cohort.** The data paired by dotted-line brackets show an increase in antibody concentrations in year 6 among males but not among females. The low and high tiers of seropositive participants are differentiated at the  $\geq 1·8$  IU/ml threshold. CI, confidence interval; GMC, geometric mean concentration; IQR, interquartile range; n.a., not applicable.

| <b>I. Seroreversion</b>                         | <b>N</b> | <b>Percentage of vaccinees (95% CI)</b> | <b>Percentage of year-2·3 seropositives</b>     | <b>Percentage of year-6 total seronegatives</b> | <b>From the low tier of seropositives</b>              | <b>From the high tier of seropositives</b>        | <b>Males (%)</b> | <b>Females (%)</b> |
|-------------------------------------------------|----------|-----------------------------------------|-------------------------------------------------|-------------------------------------------------|--------------------------------------------------------|---------------------------------------------------|------------------|--------------------|
| Total seroreverters                             | 27       | 6·2%                                    | 22·3%                                           | 10·9%                                           | 27                                                     | 0                                                 | 17 (63%)         | 10 (37%)           |
| To seronegative                                 | 16       | 3·7%                                    | 13·2%                                           | 6·5%                                            | 16                                                     | 0                                                 | 10 (62%)         | 6 (38%)            |
| To borderline                                   | 11       | 2·5%                                    | 9·1%                                            | 4·4%                                            | 11                                                     | 0                                                 | 7 (64%)          | 4 (36%)            |
| <b>Year-2·3 antibody concentrations (IU/ml)</b> |          |                                         |                                                 |                                                 |                                                        |                                                   |                  |                    |
|                                                 |          | <b>GMC (95% CI)</b>                     | <b>Median</b>                                   | <b>IQR</b>                                      |                                                        |                                                   |                  |                    |
| Total seroreverters                             |          | 0·741 (0·665–0·832)                     | 0·644                                           | 0·605–0·915                                     |                                                        |                                                   |                  |                    |
| From the low tier                               |          | 0·741 (0·665–0·832)                     | 0·644                                           | 0·605–0·915                                     |                                                        |                                                   |                  |                    |
| From the high tier                              |          | n.a.                                    | n.a.                                            | n.a.                                            |                                                        |                                                   |                  |                    |
| To seronegative                                 |          | 0·689 (0·613–0·778)                     | 0·610                                           | 0·591–0·907                                     |                                                        |                                                   |                  |                    |
| To borderline                                   |          | 0·823 (0·686–1·01)                      | 0·762                                           | 0·607–0·965                                     |                                                        |                                                   |                  |                    |
| <b>II. Late seroconversion</b>                  | <b>N</b> | <b>Percentage of vaccinees (95% CI)</b> | <b>Percentage of year-2·3 non-seropositives</b> | <b>Percentage of year-6 total seropositives</b> | <b>From seronegative (percentage of seronegatives)</b> | <b>From borderline (percentage of borderline)</b> | <b>Males (%)</b> | <b>Females (%)</b> |
| Total seroconverters                            | 94       | 21·6%                                   | 29·8%                                           | 50·0%                                           | 80 (30·3%)                                             | 14 (27%)                                          | 50 (53%)         | 44 (47%)           |
| To the low tier                                 | 60       | 13·8%                                   | 19·0%                                           | 31·9%                                           | 47 (17·8%)                                             | 13 (25%)                                          | 36 (60%)         | 24 (40%)           |
| To the high tier                                | 34       | 7·8%                                    | 10·8%                                           | 18·1%                                           | 33 (12·5%)                                             | 1 (2%)                                            | 14 (41%)         | 20 (59%)           |
| <b>Year-6 antibody concentrations (IU/ml)</b>   |          |                                         |                                                 |                                                 |                                                        |                                                   |                  |                    |
|                                                 |          | <b>GMC (95% CI)</b>                     | <b>Median</b>                                   | <b>IQR</b>                                      |                                                        |                                                   |                  |                    |
| Total seroconverters                            |          | 1·65 (1·35–2·06)                        | 1·28                                            | 0·765–2·43                                      |                                                        |                                                   |                  |                    |
| From seronegative                               |          | 1·75 (1·40–2·24)                        | 1·44                                            | 0·832–2·86                                      |                                                        |                                                   |                  |                    |
| From borderline                                 |          | 1·16 (0·838–1·90)                       | 1·02                                            | 0·763–1·23                                      |                                                        |                                                   |                  |                    |
| To the low tier                                 |          | 0·901 (0·824–0·986)                     | 0·911                                           | 0·643–1·19                                      |                                                        |                                                   |                  |                    |
| To the high tier                                |          | 4·80 (3·49–6·92)                        | 2·88                                            | 2·37–5·77                                       |                                                        |                                                   |                  |                    |

**Appendix table 2: Statistics for seroreverters and late seroconverters in the Ghana cohort.** Seronegative denotes no read-out at the lowest dilution in the assay. Borderline, measurable antibody concentration  $<0·5$  IU/ml. Seropositive, antibody concentration  $\geq 0·5$  IU/ml. Seroreversion denotes deterioration to the borderline or negative stratum; late seroconversion denotes amelioration of negative or borderline participants to the seropositive stratum 6 years postvaccination. The low and high tiers of seropositive participants are differentiated at the  $\geq 1·8$  IU/ml threshold. CI, confidence interval; GMC, geometric mean concentration; IQR, interquartile range; n.a., not applicable.



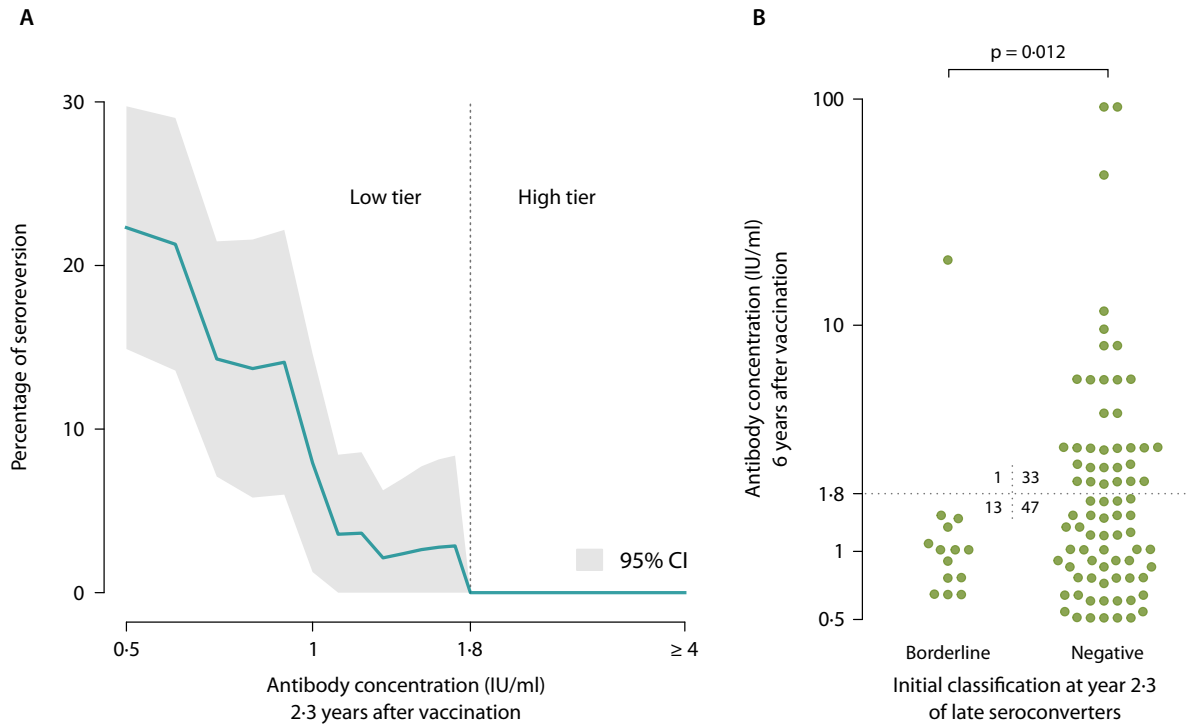

**Appendix figure 3: Seroreversion and late seroconversion in the Ghanaian group.**

Seroreversion denotes deterioration to the borderline or negative stratum; late seroconversion denotes amelioration of negative or borderline participants to the seropositive stratum 6 years postvaccination. **(A)** Percentage of seroreverters as a function of a moving concentration threshold. The 1.8-IU/ml threshold (dotted line) defined a seroreversion-free high tier of seropositive participants. **(B)** Year-6 antibody concentrations for late seroconverters (n=94), split by year-2-3 source stratum; p-value from Boschloo's test of the proportions of low- and high-tier seropositives (inset).-

| Study population                                                                                                | Number of participants |             |             | P-value | $\chi^2$ test |
|-----------------------------------------------------------------------------------------------------------------|------------------------|-------------|-------------|---------|---------------|
|                                                                                                                 | Total                  | Males (%)   | Females (%) |         |               |
| Mali, year 4·5                                                                                                  | 587                    | 297 (50·6%) | 290 (49·4%) | n.a.    | n.a.          |
| Ghana, year 2·3 and year 6                                                                                      | 436                    | 226 (51·8%) | 210 (48·2%) | n.a.    | n.a.          |
| <b>A. Seropositive participants (antibody concentration <math>\geq 0·5</math> IU/ml)</b>                        |                        |             |             |         |               |
| Mali, year 4·5                                                                                                  |                        |             |             |         |               |
| Total                                                                                                           | 296                    | 151 (51%)   | 145 (49%)   | 0·91    | 1             |
| Low tier                                                                                                        | 242                    | 127 (52·5%) | 115 (47·5%) | 0·29    | 2             |
| High tier                                                                                                       | 54                     | 24 (44%)    | 30 (56%)    |         |               |
| Ghana, year 2·3                                                                                                 |                        |             |             |         |               |
| Total                                                                                                           | 121                    | 66 (54·5%)  | 55 (45·5%)  | 0·58    | 1             |
| Low tier                                                                                                        | 90                     | 53 (59%)    | 37 (41%)    | 0·14    | 2             |
| High tier                                                                                                       | 31                     | 13 (42%)    | 18 (58%)    |         |               |
| Ghana, year 6                                                                                                   |                        |             |             |         |               |
| Total                                                                                                           | 188                    | 99 (52·7%)  | 89 (47·3%)  | 0·83    | 1             |
| Low tier                                                                                                        | 110                    | 58 (52·7%)  | 52 (47·3%)  | 1       | 2             |
| High tier                                                                                                       | 78                     | 41 (53%)    | 37 (47%)    |         |               |
| <b>B. Borderline participants (measurable antibody concentration <math>&lt; 0·5</math> IU/ml)</b>               |                        |             |             |         |               |
| Mali, year 4·5                                                                                                  | 113                    | 52 (46%)    | 61 (54%)    | 0·35    | 1             |
| Ghana, year 2·3                                                                                                 | 51                     | 27 (53%)    | 24 (47%)    | 0·89    | 1             |
| Ghana 6 years                                                                                                   | 35                     | 18 (51%)    | 17 (49%)    | 1       | 1             |
| <b>C = A + B. Broadly seropositive participants (all participants with a measurable antibody concentration)</b> |                        |             |             |         |               |
| Mali, year 4·5                                                                                                  | 409                    | 203 (49·6%) | 206 (50·4%) | 0·74    | 1             |
| Ghana, year 2·3                                                                                                 | 172                    | 93 (54·1%)  | 79 (45·9%)  | 0·59    | 1             |
| Ghana, year 6                                                                                                   | 223                    | 117 (52·5%) | 106 (47·5%) | 0·89    | 1             |

**Appendix table 3: Proportions of males and females in the study populations and serological strata.  $\chi^2$  test 1:** Tests the hypothesis that the proportions of males and females in a given serological stratum are the same as in the total study population.  **$\chi^2$  test 2:** Tests the hypothesis that the proportions of low- and high-tier seropositives are equal between males and females. The low and high tiers of seropositive participants are differentiated at the  $\geq 1·8$  IU/ml threshold. n.a., not applicable.

| Study population                                                                      | Geometric mean concentration and 95% CI (IU/ml) |                     |  | P-value |
|---------------------------------------------------------------------------------------|-------------------------------------------------|---------------------|--|---------|
|                                                                                       | Males                                           | Females             |  |         |
| <b>Seropositive participants (antibody concentration <math>\geq 0·5</math> IU/ml)</b> |                                                 |                     |  |         |
| Mali, year 4·5                                                                        | 1·06 (0·964–1·17)                               | 1·18 (1·05–1·33)    |  | 0·16    |
| Low tier                                                                              | 0·858 (0·808–0·912)                             | 0·869 (0·815–0·926) |  | 0·79    |
| High tier                                                                             | 3·20 (2·78–3·73)                                | 3·82 (3·12–4·77)    |  | 0·23    |
| Ghana, year 2·3                                                                       | 1·28 (1·03–1·62)                                | 1·52 (1·17–2·02)    |  | 0·35    |
| Low tier                                                                              | 0·863 (0·779–0·957)                             | 0·842 (0·755–0·942) |  | 0·77    |
| High tier                                                                             | 6·33 (3·97–10·4)                                | 5·07 (3·50–8·06)    |  | 0·51    |
| Ghana, year 6                                                                         | 1·80 (1·46–2·24)                                | 1·78 (1·47–2·18)    |  | 0·95    |
| Low tier                                                                              | 0·876 (0·802–0·959)                             | 0·960 (0·869–1·06)  |  | 0·19    |
| High tier                                                                             | 4·97 (3·76–6·78)                                | 4·25 (3·31–5·59)    |  | 0·45    |

**Appendix table 4: Mean antibody concentrations by sex and seropositivity tier.** The low and high tiers of seropositive participants are differentiated at the  $\geq 1·8$  IU/ml threshold. P-value from an independent-samples permutation test on the difference of geometric mean concentrations.

| Comparison | Number of participants      |                             | Two-sided McNemar's test    |                     |                   |
|------------|-----------------------------|-----------------------------|-----------------------------|---------------------|-------------------|
|            |                             |                             | p-value                     | Odds ratio (95% CI) |                   |
| <b>A</b>   | Year 2·3                    | Year 6                      |                             | $7 \times 10^{-10}$ | 3·48 (2·25–5·56)  |
|            | Seronegative and borderline | Seronegative and borderline | Seropositive                |                     |                   |
|            | Seropositive                | 221                         | 94                          |                     |                   |
|            |                             | 27                          | 94                          |                     |                   |
| <b>B</b>   | Year 2·3                    | Year 6                      |                             | $1 \times 10^{-5}$  | 2·28 (1·55–3·39)  |
|            | Seronegative                | Seronegative                | Seropositive and borderline |                     |                   |
|            | Seropositive and borderline | 173                         | 91                          |                     |                   |
|            |                             | 40                          | 132                         |                     |                   |
| <b>C</b>   | Females, year 2·3           | Females, year 6             |                             | 1                   | 0·875 (0·27–2·76) |
|            |                             | Low tier                    | High tier                   |                     |                   |
|            | Low tier                    | 20                          | 7                           |                     |                   |
|            | High tier                   | 8                           | 10                          |                     |                   |
| <b>D</b>   | Males, year 2·3             | Males, year 6               |                             | 0·0013              | 8 (1·88–71·7)     |
|            |                             | Low tier                    | High tier                   |                     |                   |
|            | Low tier                    | 20                          | 16                          |                     |                   |
|            | High tier                   | 2                           | 11                          |                     |                   |

**Appendix table 5: McNemar's tests on the paired year-2·3 and year-6 sera from the Ghana cohort.** Seronegative denotes no read-out at the lowest dilution in the seroneutralization assay. Borderline, measurable antibody concentration <0·5 IU/ml. Seropositive, antibody concentration  $\geq 0\cdot 5$  IU/ml. The low and high tiers of seropositive participants are differentiated at the  $\geq 1\cdot 8$  IU/ml threshold. CI, confidence interval.

**A.** Cohort-wide seroconversion versus seroreversion events between years 2·3 and 6 post-vaccination. Seroconversion exceeds seroreversion.

**B.** Cohort-wide amelioration versus deterioration cases between years 2·3 and 6 post-vaccination. Similar to (A) above but merging together the seropositive and borderline strata. Amelioration exceeds deterioration.

**C.** Serostable females: upward transitions from the low to the high tier of seropositives, versus downward transitions from the high to the low tier, between years 2·3 and 6 post-vaccination. Upward and downward transitions are approximately balanced.

**D.** Serostable males: upward transitions from the low to the high tier of seropositives, versus downward transitions from the high to the low tier, between years 2·3 and 6 post-vaccination. Upward transitions exceed downward transitions.

### Appendix references

1. Good P. Permutation tests: a practical guide to resampling methods for testing hypotheses. 2nd ed. New York: Springer-Verlag, 2000.
2. Ruxton GD, Neuhäuser M. Improving the reporting of P-values generated by randomization methods. *Methods Ecol Evol* 2013; **4**: 1033-6.
